# Supplementary material for: MicroRNA-Mediated Responses to Cadmium Stress in Arabidopsis thaliana
Source: PubMed Central journal article supplement (PMC7827075; doi:10.3390/plants10010130), 2021-01-10
Supplement: plants-10-00130-s001.pdf [file plants-10-00130-s001.pdf]

**Supplementary Table S1:** Oligonucleotide sequence of DNA primers used in this study. Primers listed were used for miRNA-specific cDNA synthesis, RT-qPCR assessment of mRNA transcript abundance or SL-RT-qPCR assessment of miRNA accumulation.

| Transcript    | Gene ID   | Oligonucleotide sequence (5' to 3') |
|---------------|-----------|-------------------------------------|
| <i>UBI10</i>  | AT4G05320 | FP: GGCCTTGTATAATCCCTGATGAATAAG     |
|               |           | RP: AAAGAGATAACAGGAACGGAAACATA      |
| <i>SPL7</i>   | AT5G18830 | FP: CACTGTACCTGTGACTGCGA            |
|               |           | RP: CACACAACAGCAACCTGACG            |
| <i>PDR8</i>   | AT1G59870 | FP: TTATGGACGTTTTGGCCGGA            |
|               |           | RP: ACTGTTACTTGCGGGGAGTG            |
| <i>NRAMP6</i> | AT1G15960 | FP: TCCTCGGTGCCATGGTTATG            |
|               |           | RP: ATGCCGGTACTGAACGAGG             |
| <i>FSD1</i>   | AT4G25100 | FP: TCCATTGCACTGGATGCTT             |
|               |           | RP: TGCTCTAAGGGCTTGCCTTC            |
| <i>HMAS2</i>  | AT4G30110 | FP: GATAAGCATTGCAAGCCGGG            |
|               |           | RP: TCCGAACGGCTTTAGCTGG             |
| <i>HMA4</i>   | AT2G19110 | FP: AAACCCAAACAGCAGGTGGA            |
|               |           | RP: ATCTGCACCGGGACAACAAT            |
| <i>ARF10</i>  | AT2G28350 | FP: TTTCCCGCGCTTGATTACT             |
|               |           | RP: GGTTAGGAGATGACGGCGAG            |
| <i>ARF16</i>  | AT4G30080 | FP: TTCGCCACCGAGGAAAAAGA            |
|               |           | RP: CCACGGGAACATTGTCCAGA            |
| <i>ARF17</i>  | AT1G77850 | FP: TGCACATGCAACTCAACTGC            |
|               |           | RP: GACTTGGATCAGGTGCTGCT            |
| <i>ARF6</i>   | AT1G30330 | FP: GTGTTGTCGGTACATGGGT             |
|               |           | RP: CTTGACAGATCGCCAATGCG            |
| <i>ARF8</i>   | AT5G37020 | FP: CCCAAGCCTACCACCACAAT            |
|               |           | RP: TCCTCCGGTGTCAATGGTTG            |
| <i>TIR1</i>   | AT3G62980 | FP: GTGCTTGCTTCAACCTGCAA            |
|               |           | RP: TTTGGACAGCCCATGGAGAC            |
| <i>ATPS1</i>  | AT3G22890 | FP: ATCTCCGGCACTAAGATGCG            |
|               |           | RP: ACCTGGGCACATAAAACCGT            |
| <i>PHO2</i>   | AT2G33770 | FP: ACCGTTTCTCATCAAGGCGT            |
|               |           | RP: GTGCCCGTCCACCATAAGAA            |
| <i>LAC3</i>   | AT2G30210 | FP: CCGTTCGACAACACAACCAC            |
|               |           | RP: GACTGGGAAAACAGGAGCGA            |
| <i>GRF1</i>   | AT2G22840 | FP: CGTCGCATAAACAAGCCTCG            |
|               |           | RP: ATTTAGCTCTTCGGGCCAA             |
| <i>GRF2</i>   | AT4G37740 | FP: CTTGGCCTGAAGAGCTGACA            |
|               |           | RP: GTGTGTGGAGGAAGGGGATG            |
| <i>GRF3</i>   | AT2G36400 | FP: CCATACGAGTCCCACATCGG            |
|               |           | RP: CTGAGCTCATGGGGCTTGAA            |
| <i>GRF7</i>   | AT5G53660 | FP: CATCCCCACCGTTAGATCG             |
|               |           | RP: TGCTTCCATGCTTCCGACAT            |
| <i>GRF8</i>   | AT4G24150 | FP: GCTGCTGTGACTGTAGCAGA            |
|               |           | RP: CTCATGCCATTGAGCTTCGC            |

|               |                                                          |                          |
|---------------|----------------------------------------------------------|--------------------------|
| <i>GRF9</i>   | AT2G42590                                                | FP: CTCACATGAGAATGCCGGGT |
|               |                                                          | RP: ATCAGAAACTCGGGGCAGTG |
| Universal-SLR |                                                          | RP: CCAGTGCAGGGTCCGAGGTA |
| snoR101       | FP: CTTCACAGGTAAGTTCGCTTG                                |                          |
|               | RP: AGCATCAGCAGACCAGTAGTT                                |                          |
| miR160        | FP: AACGTGCCTGGCTCCCTGTATGCC                             |                          |
|               | RTSL: GTCGTATCCAGTGCAGGGTCCGAGGTATTCGCACTGGATACGACTGGCAT |                          |
| miR167        | FP: CGCGCCTGAAGCTGCCAGCATGATCTG                          |                          |
|               | RTSL: GTCGTATCCAGTGCAGGGTCCGAGGTATCCGCACTGGATACGACCAGATC |                          |
| miR393        | FP: CGGCGCCTCAAAGGGATCGCATTGAT                           |                          |
|               | RTSL: GTCGTATCCAGTGCAGGGTCCGAGGTATTCGCACTGGATACGACGATCAA |                          |
| miR395        | FP: GCGCTGAAGTGTTGGGGGAACTC                              |                          |
|               | RTSL: GTCGTATCCAGTGCAGGGTCCGAGGTATTCGCACTGGATACGACGAGTTC |                          |
| miR396        | FP: GCGCGTCCACAGCTTCTTGAAC                               |                          |
|               | RTSL: GTCGTATCCAGTGCAGGGTCCGAGGTATTCGCACTGGATACGACAAGTTC |                          |
| miR399        | FP: GCATGCCAAAGGAGATTTGCCCTG                             |                          |
|               | RTSL: GTCGTATCCAGTGCAGGGTCCGAGGTATTCGCACTGGATACGACCAGGGC |                          |
| miR408        | FP: ACGACAGGGAACAAGCAGAGCATG                             |                          |
|               | RTSL: GTCGTATCCAGTGCAGGGTCCGAGGTATTCGCACTGGATACGACCATGCT |                          |
